# Supplementary material for: A study on an efficient citrus Huanglong disease detection algorithm based on three-channel aggregated attention
Source: PeerJ journal article supplement (doi:10.7717/peerj-cs.2943), 2025-07-08
Supplement: data_staffEH.zip [file data_staffEH.zip]

## Sheet: Sheet1
Citrus experimental statistics
Model type	MAP50	pre-process	inference	NMS	FPS	clarification
yolov5m	0.959	0.1	2	0.9	333.333
yolov6s	0.965	0.7	1.4	0.9	333.333
yolov7x	0.967	3.7	0.9	4.5	109.89
yolov8s	0.959	0.7	1.5	1.2	294.118	ablation experiment
yolov8-p6	0.965	0.9	1.5	1.1	285.714
yolov8-ghost	0.959	0.9	1.4	1.9	238.095
yolov8s-c2f	0.968	0.6	3	0.4	250	ablation experiment
yolov8s-powerneck	0.967	0.8	2.4	1.3	222.222	ablation experiment
yolov8s-powerneck-c2f	0.97	0.5	1.4	0.8	370.37	ablation experiment
